# Supplementary material for: Inclusive fitness for in-laws
Source: PubMed Central journal article supplement (PMC6227869; doi:10.1098/rsbl.2018.0515), 2018-10-10
Supplement: rsbl20180515supp1.pdf [file rsbl20180515supp1.pdf]

## Supplementary Methods: Inclusive fitness for in-laws

M. Dyble, A. Gardner, L. Vinicius, A.B. Migliano

### Incorporating uncertainty in mating

As stated in the main text, relatedness to the “actor’s mate” ( $r_C$  in equations 2.2 and 2.5) may refer to a specific individual, or alternatively to an appropriately-weighted set of all those possible mating partners with whom the actor would have produced the  $c$  offspring that they have lost on account of their altruism. Where it represents such a weighted set of possible mating partners,  $r_C$  can be defined as:

$$r_C = \sum_{i \in I_A} p_{A,i} r_{A,i}$$

where  $I_A$  is the set of the actor’s possible mates, with  $p_{A,i}$  being the probability that individual  $i \in I_A$  would have been the parent of a particular offspring lost by the actor, and  $r_{A,i}$  being the actor’s relatedness to this possible mating partner).

Similarly, the relatedness of the actor to the recipient’s mate ( $r_D$  in equations 2.3 and 2.5) can be defined either as a specific individual or to a weighted set of all possible mating partners such that:

$$r_D = \sum_{i \in I_B} p_{B,i} r_{B,i}$$

where  $I_B$  is the set of the recipient’s possible mates, with  $p_{B,i}$  is the probability that individual  $i \in I_B$  would have been the parent of a particular offspring lost by the recipient, and  $r_{B,i}$  being the actor’s relatedness to this possible mating partner of the recipient. Defining relatedness to the actor and recipient’s mates as above allows for the incorporation of extra-pair mating, the dissolution of pair-bonds, and, in the case of human kinship, divorce.

### Inbreeding and $s$

The formulation of  $s$  given in Equation 2.5 in the main text can incorporate inbreeding. Consider the examples given in Table S1. In the absence of inbreeding, an individual will have a genetic relatedness of  $r = 0.5$  to his sister, and a shared reproductive interest of  $s = 0.5$ . Should his sister mate with his cousin of  $r = 0.125$  (as in ‘Cousin marriage 1’ in Table S1), then his interest in his sister’s offspring will increase, relative to his interest in his own offspring, leading to an estimated shared reproductive interest of  $s = 0.625$ . Conversely, if his sister mates with an unrelated individual and he mates with his cousin, then his relative interest in his sister’s offspring is lower ( $s = 0.444$ ). If both he

and his sister mate with their cousins, then the degree of shared reproductive interest is  $s = 0.556$ .

**Table S1:** The shared reproductive interest of an actor in a full sibling given various scenarios of inbreeding or cousin marriage.

| Example                      | $r_A$ | $r_B$ | $r_C$ | $r_D$ | $r_{A'}$ | $r_{B'}$ | $s$   |
|------------------------------|-------|-------|-------|-------|----------|----------|-------|
| No inbreeding (full sibling) | 1     | 0.5   | 0     | 0     | 0.5      | 0.25     | 0.5   |
| Cousin marriage 1            | 1     | 0.5   | 0     | 0.125 | 0.5      | 0.3125   | 0.625 |
| Cousin marriage 2            | 1     | 0.5   | 0.125 | 0     | 0.5625   | 0.25     | 0.444 |
| Cousin marriage 3            | 1     | 0.5   | 0.125 | 0.125 | 0.5625   | 0.3125   | 0.556 |
| Past inbreeding              | 1     | 0.6   | 0     | 0     | 0.5      | 0.3      | 0.6   |

**Table S2:** Extended calculation of coefficients of shared reproductive interest in Table 1.

| Example                           | $r_A$ | $r_B$ | $r_C$ | $r_D$ | $r_{A'}$ | $r_{B'}$ | $s$   |
|-----------------------------------|-------|-------|-------|-------|----------|----------|-------|
| Full sibling                      | 1     | 0.5   | 0     | 0     | 0.5      | 0.25     | 0.5   |
| Parent (mating with other parent) | 1     | 0.5   | 0     | 0.5   | 0.5      | 0.5      | 1     |
| Parent (mating with non-parent)   | 1     | 0.5   | 0     | 0     | 0.5      | 0.25     | 0.5   |
| Niece/nephew                      | 1     | 0.25  | 0     | 0     | 0.5      | 0.125    | 0.25  |
| Cousin                            | 1     | 0.125 | 0     | 0     | 0.5      | 0.25     | 0.125 |
| Spouse                            | 1     | 0     | 0     | 1     | 0.5      | 0.5      | 1     |
| Sibling's spouse                  | 1     | 0     | 0     | 0.5   | 0.5      | 0.25     | 0.5   |
| Spouse's sibling                  | 1     | 0     | 0     | 0     | 0.5      | 0        | 0     |
